# Supplementary material for: The Protective Effect of Chlorogenic Acid on Vascular Senescence via the Nrf2/HO-1 Pathway
Source: PubMed Central journal article supplement (PMC7350250; doi:10.3390/ijms21124527), 2020-06-25

Figure S1

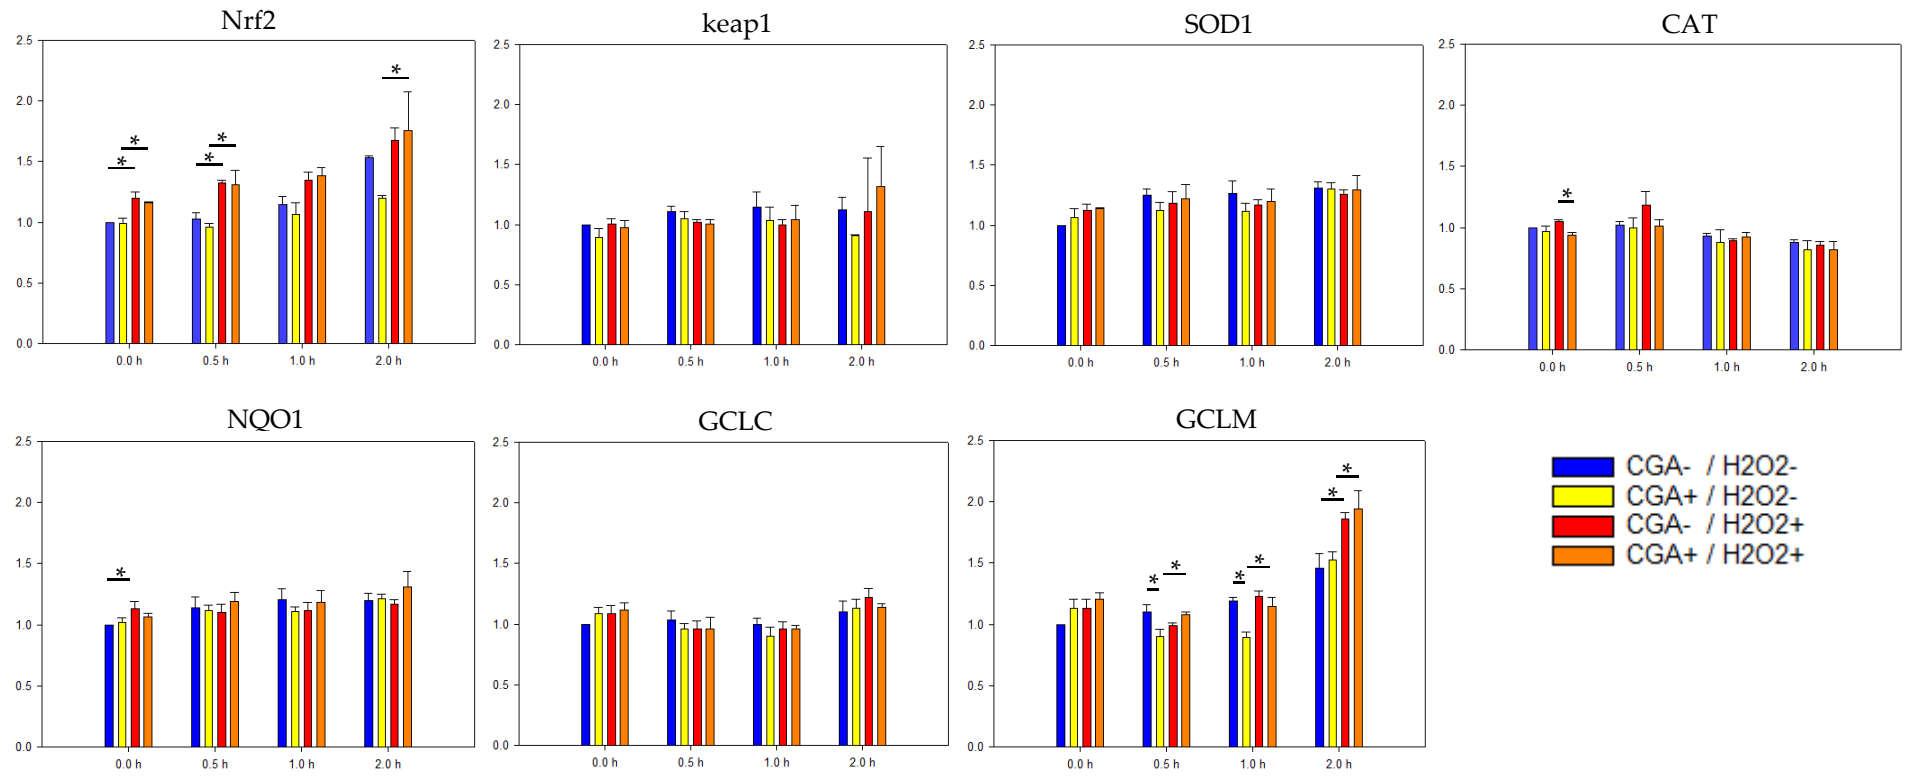

Supplement: ijms-21-04527-s001.pdf [file ijms-21-04527-s001.pdf]
